# Supplementary material for: The atmospheric oxidizing capacity in China – Part 2: Sensitivity to emissions of primary pollutants
Source: Copernicus journal article supplement (doi:10.5194/acp-24-12943-2024), 2024-11-21
Supplement: Supplementary file 1 [file acp-24-12943-2024-supplement.pdf]

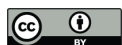

*Supplement of*

## **The atmospheric oxidizing capacity in China – Part 2: Sensitivity to emissions of primary pollutants**

**Jianing Dai et al.**

*Correspondence to:* Guy P. Brasseur ([guy.brasseur@mpimet.mpg.de](mailto:guy.brasseur@mpimet.mpg.de))

The copyright of individual parts of the supplement might differ from the article licence.

**Table S1.** Chemical species in the emission input of MOZART/MOSAIC scheme

| Chemical species in emission input <sup>a</sup> |                                                                                                                                                                       |
|-------------------------------------------------|-----------------------------------------------------------------------------------------------------------------------------------------------------------------------|
| NO <sub>x</sub>                                 | E_NO, E_NO2                                                                                                                                                           |
| AVOCs                                           | E_C2H4, E_C3H6, E_BIGENE, E_C2H6, E_C3H8, E_BIGALK,<br>E_BENZENE, E_TOLUENE, E_XYLENE, E_C2H2, E_MACR,<br>E_CH3CHO, E_C2H5OH, E_CH3OH, E_C10H16, E_CH3COCH3,<br>E_MVK |
| Other                                           | E_CO, E_NH3, E_SO2                                                                                                                                                    |

Notes: <sup>a</sup>inputs of anthropogenic emissions is obtained from MEIC emission inventory.

**Table S2.** Speciation of OVOCs species

| OVOCs          | Species <sup>a</sup>                                                                                                                                                                                                                                                                              |
|----------------|---------------------------------------------------------------------------------------------------------------------------------------------------------------------------------------------------------------------------------------------------------------------------------------------------|
| Ketones        | MVK, ACET, ACETOL, MEK                                                                                                                                                                                                                                                                            |
| Alcohols       | CH <sub>3</sub> OH, C <sub>2</sub> H <sub>5</sub> OH'                                                                                                                                                                                                                                             |
| Formaldehydes  | HCHO                                                                                                                                                                                                                                                                                              |
| Oth. aldehydes | CH <sub>3</sub> CHO, MACR, HYDRALD, OPEN, BALD                                                                                                                                                                                                                                                    |
| Glyoxal        | GLY, MGLY                                                                                                                                                                                                                                                                                         |
| Org. nitrates  | ONITR, ONIT                                                                                                                                                                                                                                                                                       |
| PAN            | PAN, MPAN                                                                                                                                                                                                                                                                                         |
| Org. peroxides | C <sub>3</sub> H <sub>6</sub> OOH, C <sub>2</sub> H <sub>5</sub> OOH, PROOH, ISOOH, ALKOOH, ROOH, TERP <sub>2</sub> OOH, XYLENOOH, BENZOOH, BZOOH, XYLOLOOH, XOOH, MEKOOH, TOLOOH, MBOOOH, TERPOOH, CH <sub>3</sub> OOH, MVKOOH, PHENOOH, C <sub>6</sub> H <sub>5</sub> OOH, HOCH <sub>2</sub> OO |

Notes: <sup>a</sup> specific OVOCs species are obtained from the WRF-Chem v 4.1.2 with the gas-phase scheme MOZART.

**Table S3.** Percentage of grid cells in different ozone sensitivity regimes

|        | Ozone<br>sensitivity<br>regimes | <i>BASE</i> | <i>NO<sub>x</sub></i> | <i>AVOCs</i> | <i>N+A</i> | <i>TOTAL</i> |
|--------|---------------------------------|-------------|-----------------------|--------------|------------|--------------|
| Winter | VOC-limited                     | 20.1%       | 17.0%                 | 21.3%        | 18.4%      | 18.4%        |
|        | NO <sub>x</sub> -limited        | 68.8%       | 71.9%                 | 67.9%        | 70.3%      | 70.3%        |
|        | Transition                      | 11.2%       | 11.1%                 | 10.7%        | 11.3%      | 11.2%        |
| Summer | VOC-limited                     | 3.4%        | 2.9%                  | 3.7%         | 3.0%       | 3.0%         |
|        | NO <sub>x</sub> -limited        | 91.6%       | 92.8%                 | 91.3%        | 92.5%      | 92.5%        |
|        | Transition                      | 4.9%        | 4.3%                  | 5.0%         | 4.5%       | 4.4%         |



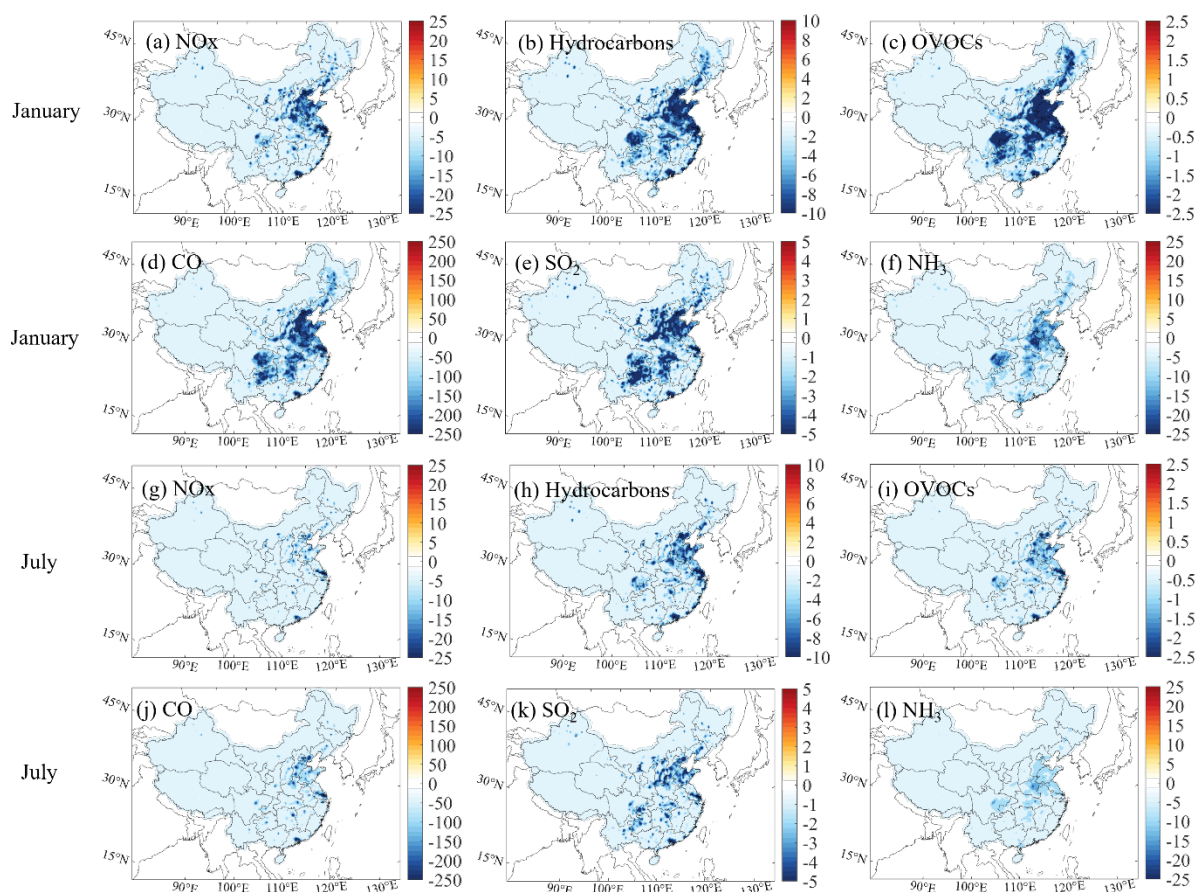

**Figure S1.** Changes in the monthly-averaged the model input of anthropogenic nitrogen oxides ( $\text{NO}_x$ ; a, g), Hydrocarbons (b, h), oxidized volatile organic components (OVOCs; c, i), carbon monoxide ( $\text{CO}$ ; d, j), sulphur dioxide ( $\text{SO}_2$ ; e, k), and ammonia ( $\text{NH}_3$ ; f, l) in January and July of 2018. Units are in  $\text{mole km}^{-2} \text{hr}^{-1}$ .

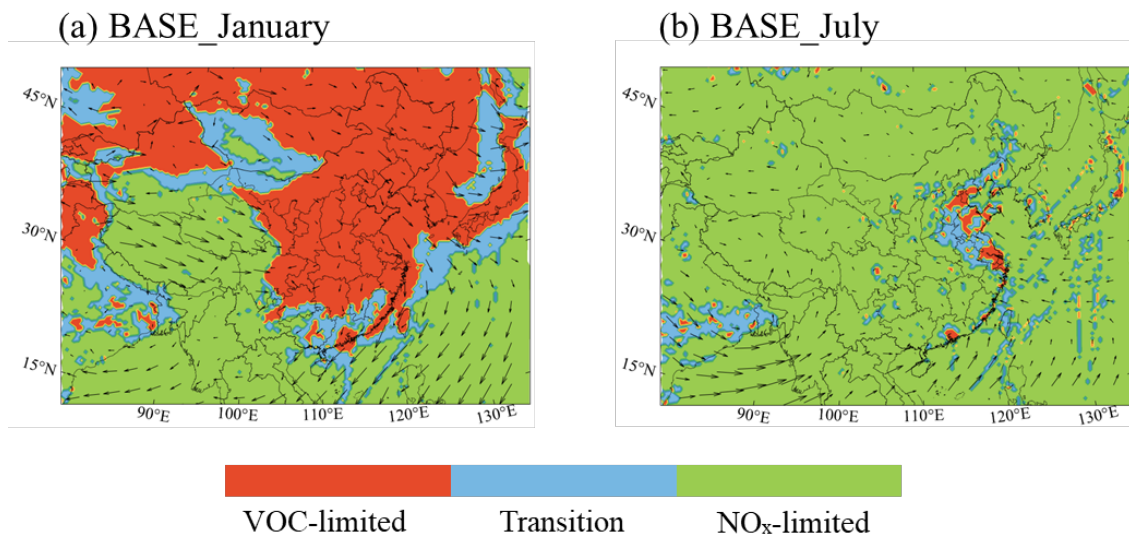

**Figure S2.** Display of regions in which ozone production is limited by the availability of nitrogen oxides (NO<sub>x</sub>-limited, in green), and volatile organic components (VOC-limited, in red) under the emissions in case of BASE conditions in January (a) and July (b) of 2018.

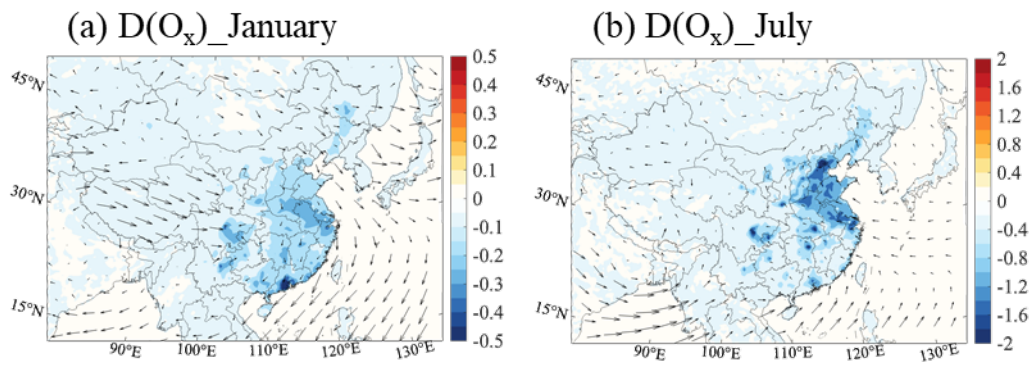

**Figure S3.** Changes in the monthly-averaged daytime destruction rate of odd oxygen ( $D(O_x)$ , Unit:  $\text{ppbv h}^{-1}$ ) due to the reduction in the  $\text{NO}_x$  emissions by 50% in January (a) and July (b) of 2018.

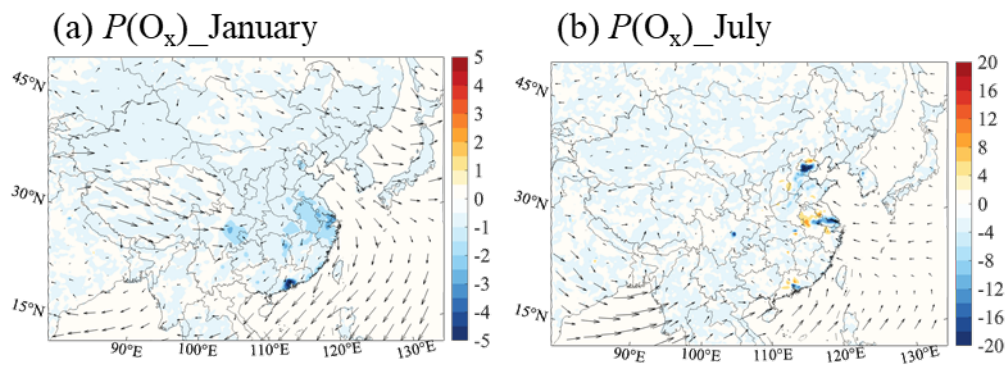

**Figure S4.** Changes in the monthly-averaged daytime production rate of odd oxygen ( $P(O_x)$ , Unit:  $\text{ppbv h}^{-1}$ ) due to the reduction in the AVOCs emissions by 50% in January (a) and July (b) of 2018.

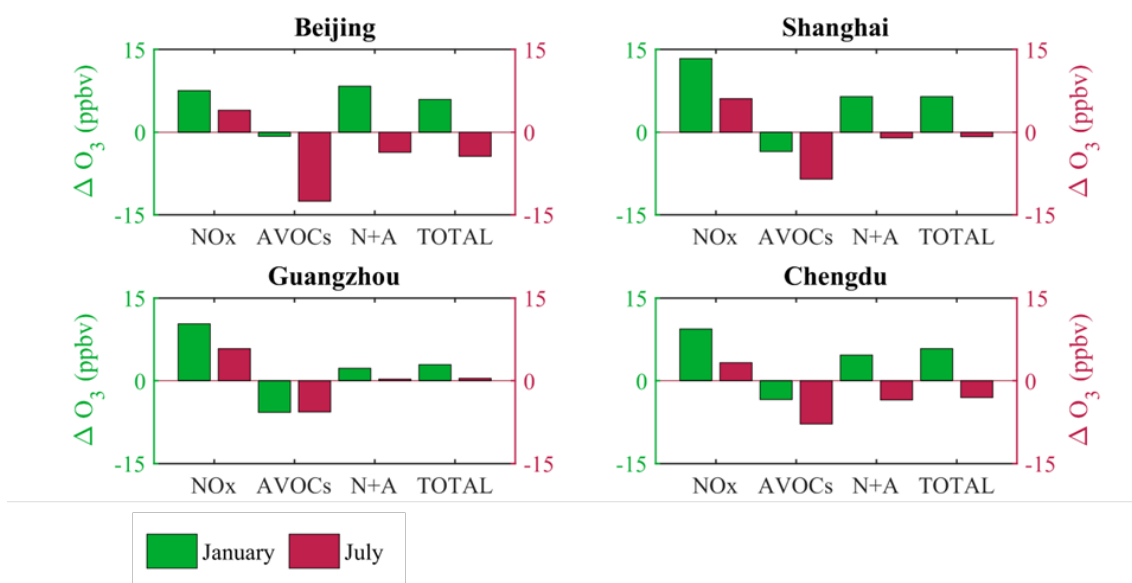

**Figure S5.** Changes in the monthly-averaged daytime ozone concentration (Unit: ppbv) response to the NOx, AVOCs, N+A, and TOTAL cases at four city sites in January and July of 2018.

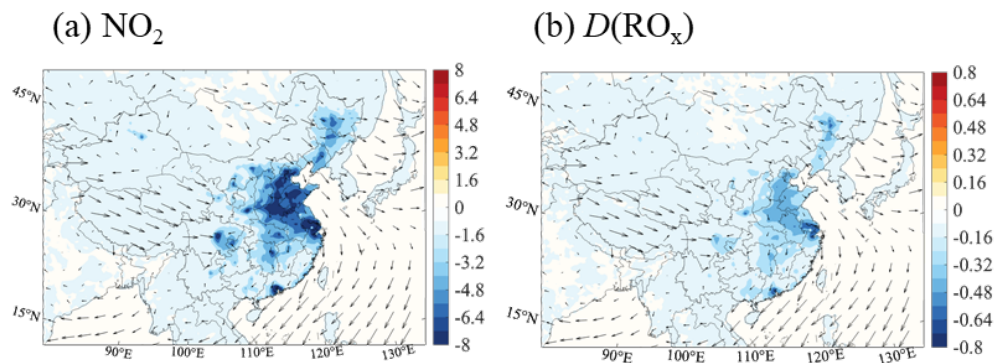

**Figure S6.** Changes in the monthly-averaged concentration of  $\text{NO}_2$  (a) [Unit: ppbv] and the destruction rate of radical from the reaction of  $\text{NO}_2$  with OH (b) [Unit:  $\text{ppbv h}^{-1}$ ] surface response to the reduction in the  $\text{NO}_x$  emission by 50% ( $\text{NO}_x$  case) relative to  $\text{BASE}$  case in January of 2018. Arrows represent the wind speed and wind direction.

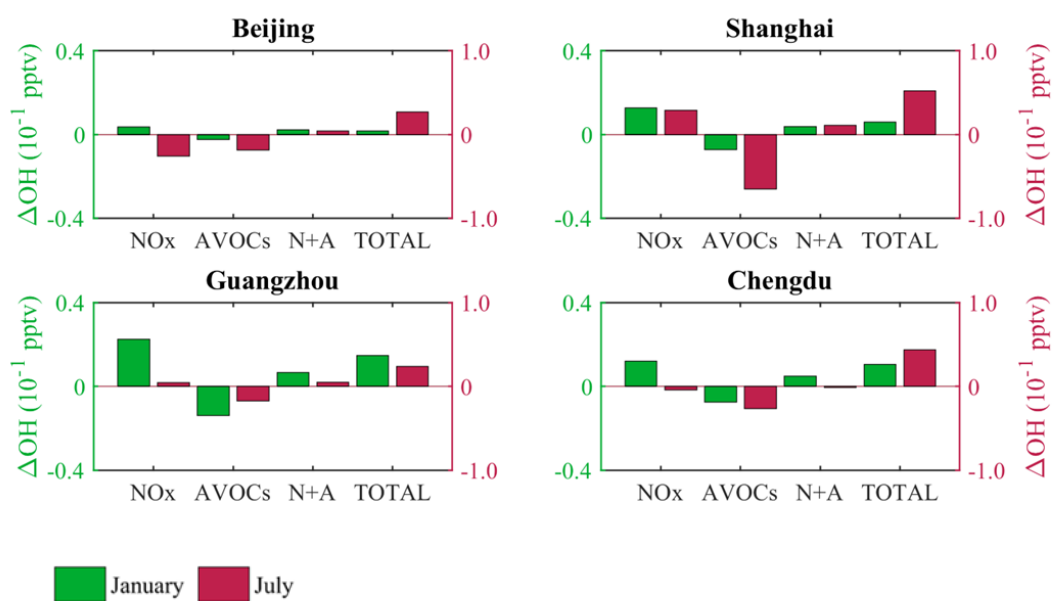

**Figure S7.** Changes in the monthly-averaged daytime mixing ratio of OH radical (Unit: 0.1 ppbv) response to the NO<sub>x</sub>, AVOCs, N+A, and TOTAL cases at four city sites in January and July of 2018.

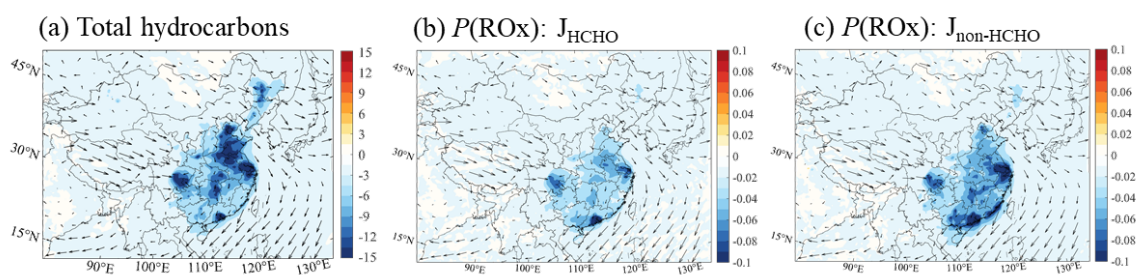

**Figure S8.** Changes in the monthly-averaged concentration of hydrocarbons (a) [Unit: ppbv] and the production rate of radical from the photolysis of formaldehyde (HCHO) (b) [Unit: ppbv h<sup>-1</sup>] and non-HCHO OVOCs (c) [Unit: ppbv h<sup>-1</sup>] response to the reduction in the AVOCs emission by 50% (*AVOCs* case) relative to *BASE* case in January of 2018. Arrows represent the wind speed and wind direction.



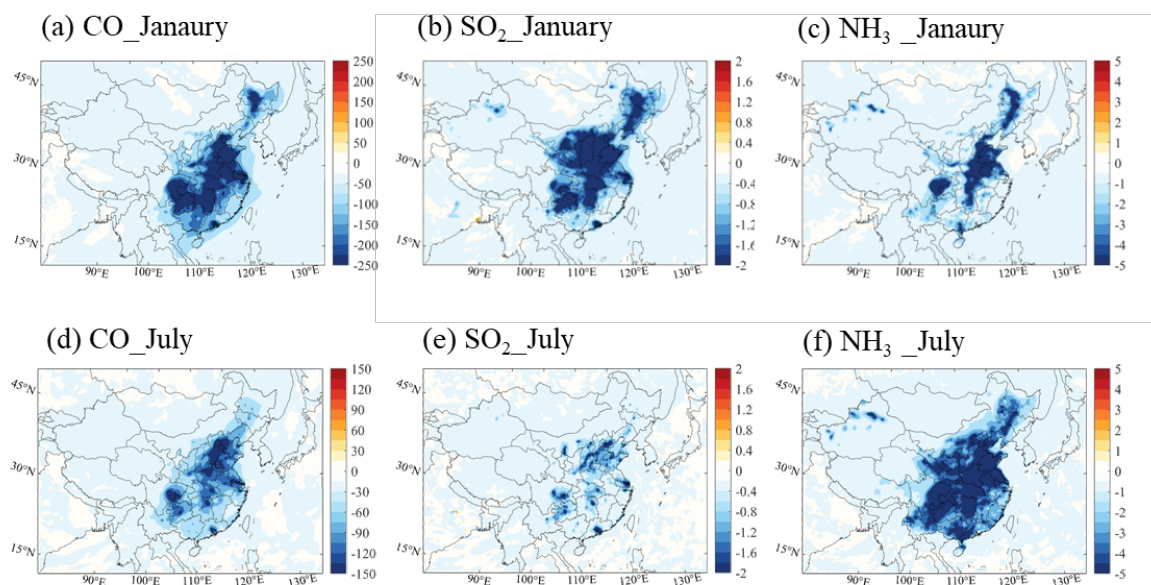

**Figure S9.** Changes in the monthly-averaged concentration of CO (a, d) [Unit: ppbv], SO<sub>2</sub> (b, e) [Unit: ppbv], and NH<sub>3</sub> (c, f) [Unit: ppbv] response to the TOTAL case relative to the N+A case in January (a-c) and July (d-f) of 2018.

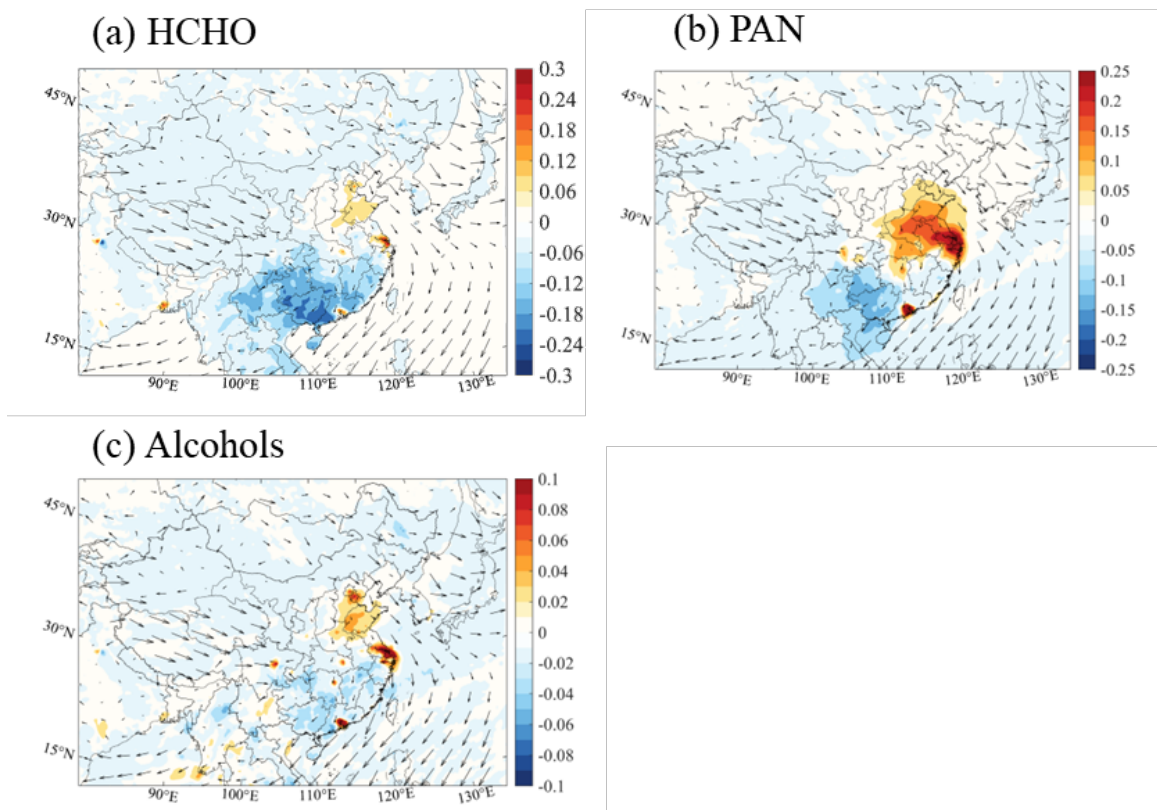

**Figure S10.** Changes in the monthly-averaged concentration of formaldehyde (HCHO) (a) [Unit: ppbv], peroxyacetyl nitrate (PAN) (b) [Unit: pptv], and alcohols (the sum of CH<sub>3</sub>OH and C<sub>2</sub>H<sub>5</sub>OH) (c) [Unit: ppbv] response to the reduction in emission of NO<sub>x</sub> relative to *BASE* case in January 2018. Arrows represent the wind speed and wind direction.

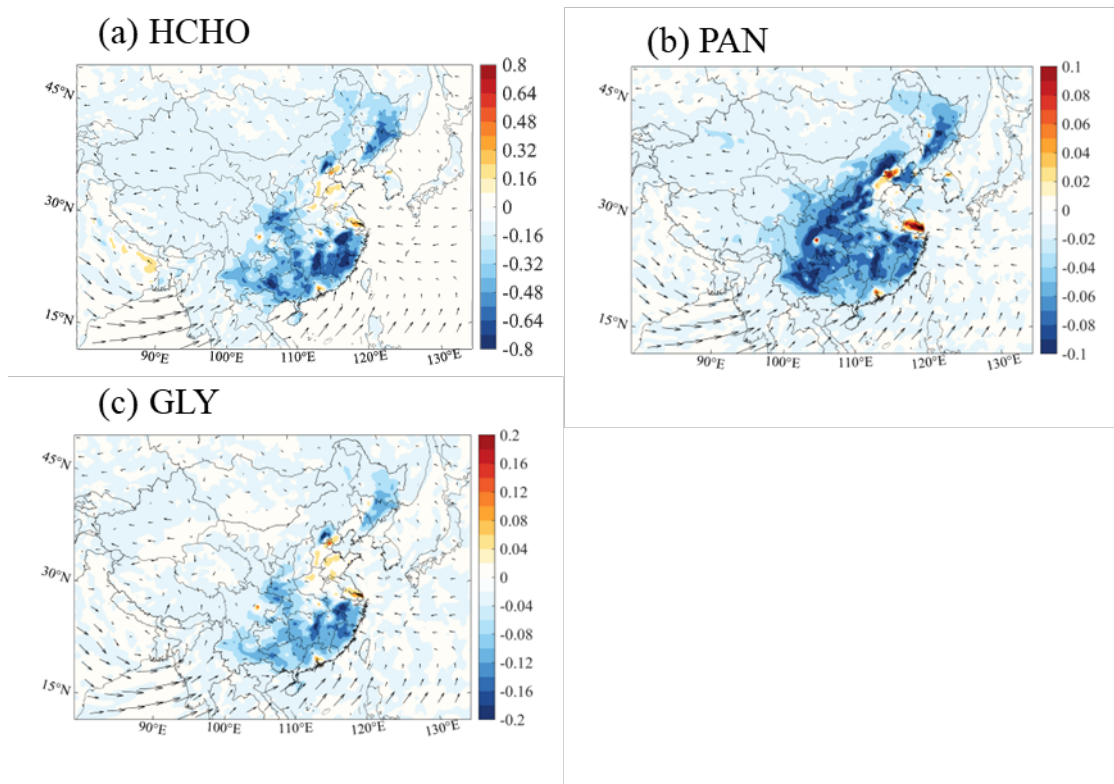

**Figure S11.** Changes in the monthly-averaged concentration of formaldehyde (HCHO) (a) [Unit: ppbv], peroxyacetyl nitrate (PAN) (b) [Unit: pptv], and glyoxal (GLY) (c) [Unit: ppbv] response to the reduction in emission of  $NO_x$  relative to *BASE* case in July 2018. Arrows represent the wind speed and wind direction.

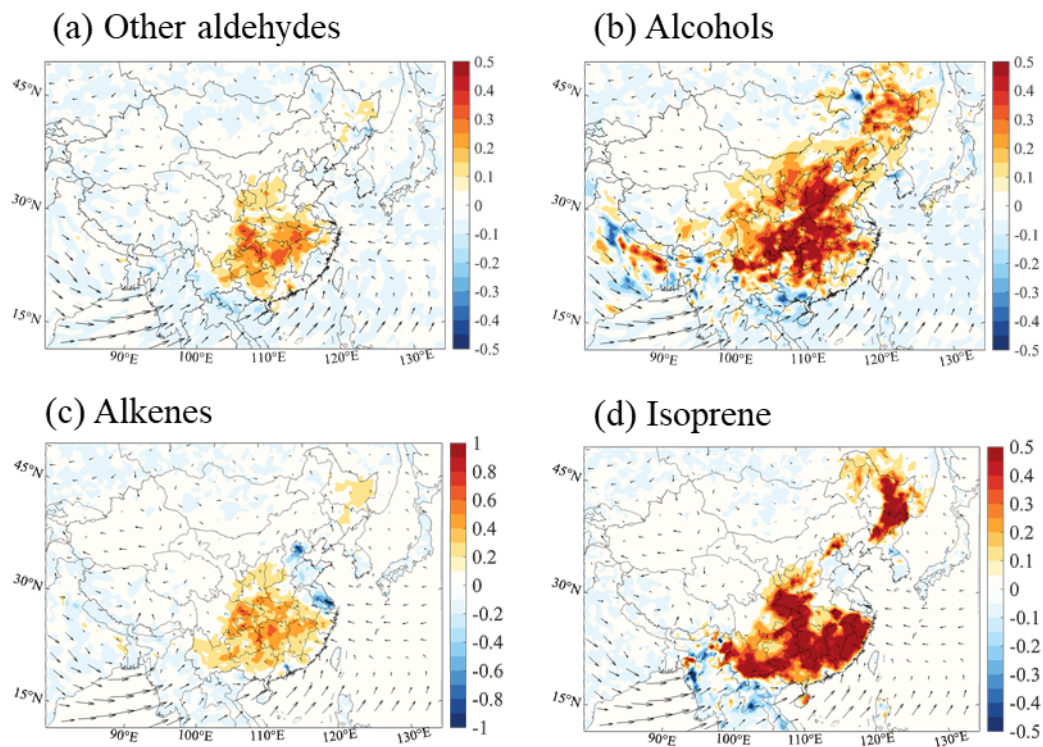

**Figure S12.** Changes in the monthly-averaged concentration of other aldehydes (aldehydes except for HCHO) (a) [Unit: ppbv], alcohols (b) [Unit: pptv], alkenes (c) [Unit: ppbv], and isoprene (d) [Unit: ppbv] response to the reduction in emission of  $NO_x$  relative to *BASE* case in July 2018. Arrows represent the wind speed and wind direction.

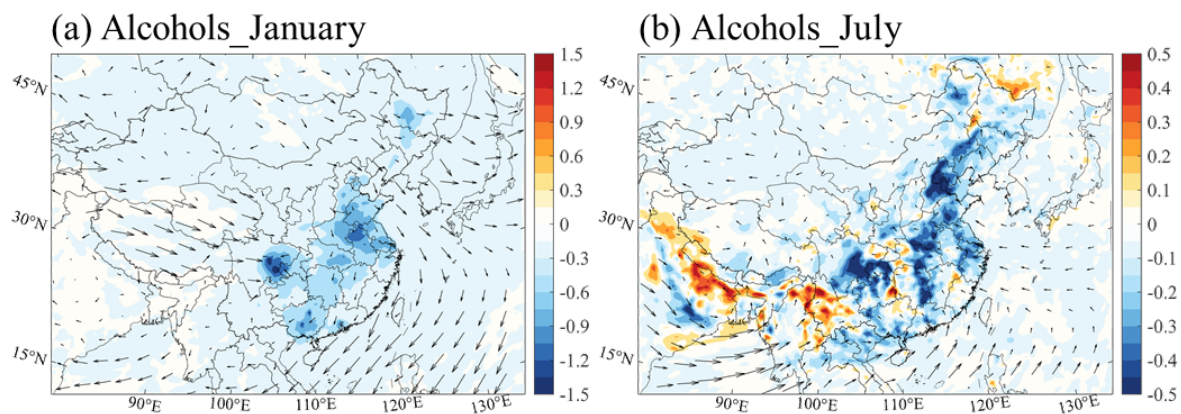

**Figure S13.** Changes in the monthly-averaged concentration of alcohols [Unit: pptv] response to the reduction in emission of *AVOCs* relative to *BASE* case in January (a) and July (b) of 2018. Arrows represent the wind speed and wind direction.



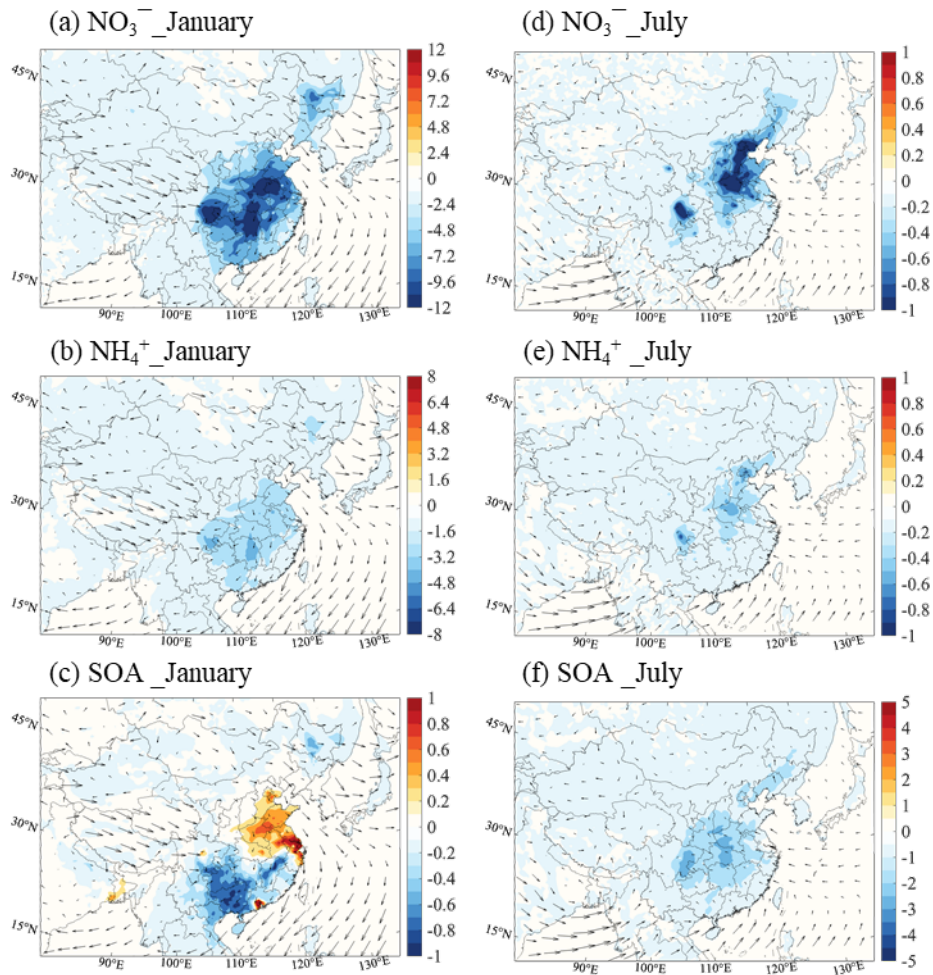

**Figure S14.** Changes in the monthly-averaged concentration of particulate nitrate (a, d) [ $\text{NO}_3^-$ ; Unit:  $\mu\text{g m}^{-3}$ ], particulate ammonia (b, e) [ $\text{NH}_4^+$ ; Unit:  $\mu\text{g m}^{-3}$ ], and Secondary Organic Aerosols (c, f) [ $\text{SOA}$ ; Unit:  $\mu\text{g m}^{-3}$ ] response to the ratio of 0.5 in  $\text{NO}_x$  emissions ( $\text{NO}_x$  case) in January (a-c) and July (d-f) of 2018. Arrows represent the wind speed and wind direction scaled by a factor of 5.

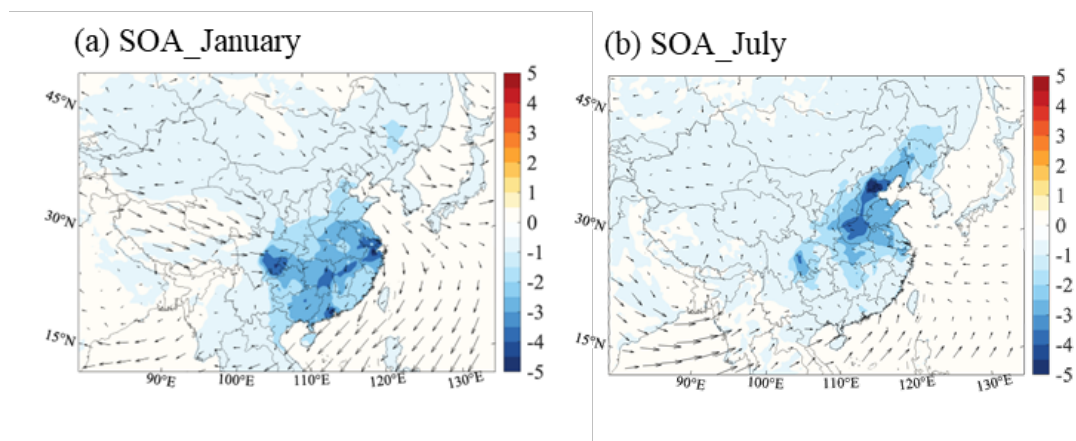

**Figure S15.** Changes in the monthly-averaged concentration of Secondary Organic Aerosols [SOA; Unit:  $\mu\text{g m}^{-3}$ ] response to the ratio of 0.5 in AVOCs emissions (a, b; AVOCs case) in January (a) and July (b) of 2018. Arrows represent the wind speed and wind direction scaled by a factor of 5.

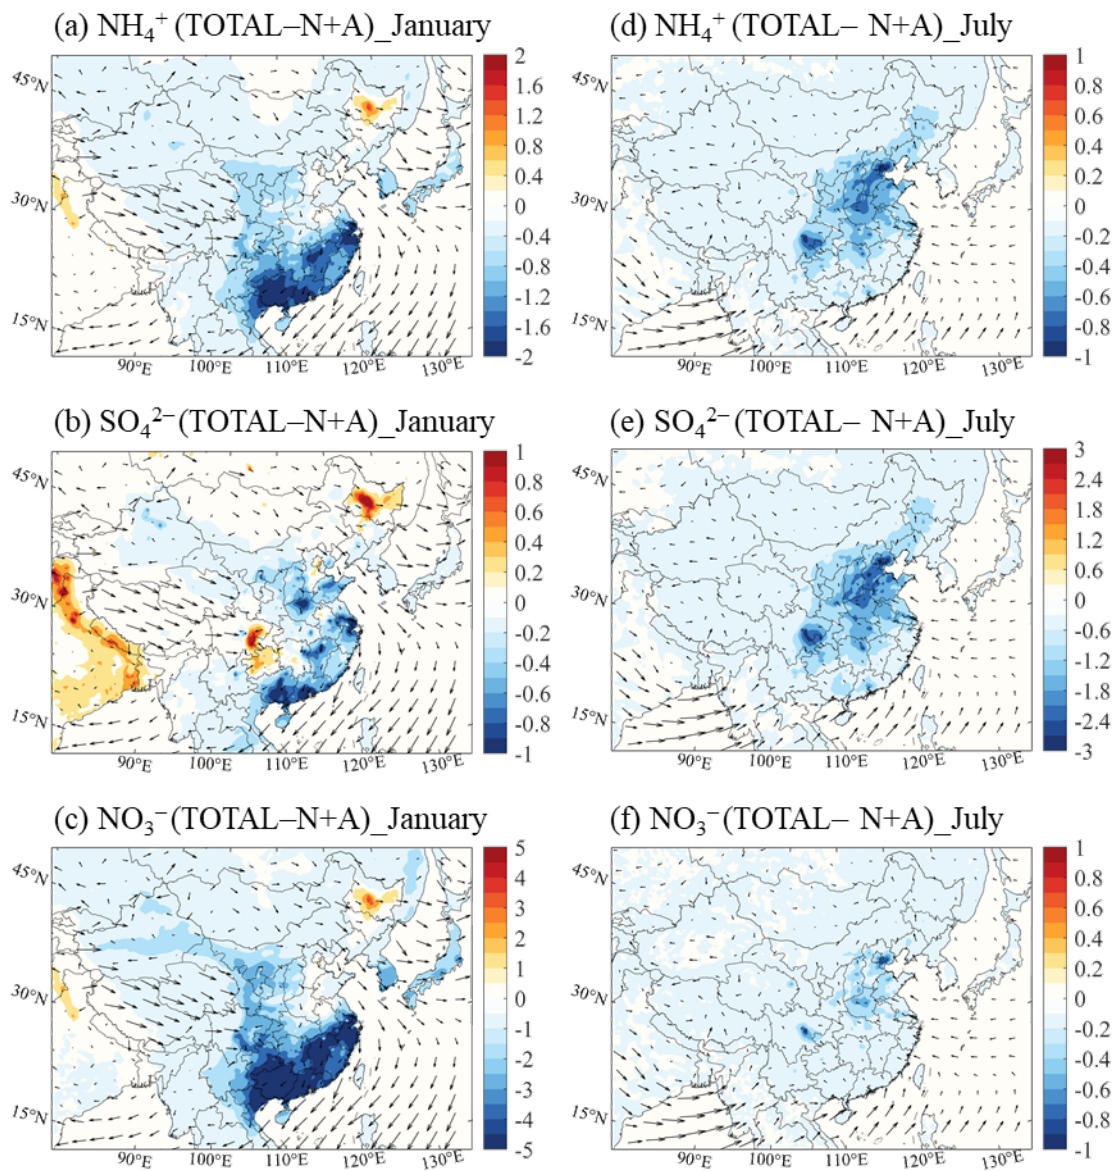

**Figure S16.** Changes in monthly-averaged concentration of particulate ammonia (a, d) [ $\text{NH}_4^+$ ; Unit:  $\mu\text{g m}^{-3}$ ], particulate sulfate (b, e) [ $\text{SO}_4^{2-}$ ; Unit:  $\mu\text{g m}^{-3}$ ], and particulate nitrate (c, f) [ $\text{NO}_3^-$ ; Unit:  $\mu\text{g m}^{-3}$ ] response to the *TOTAL* emissions case relative to *N+A* case in January (a-c) and July (d-f) of 2018. Arrows represent the scaled wind speed and wind direction.



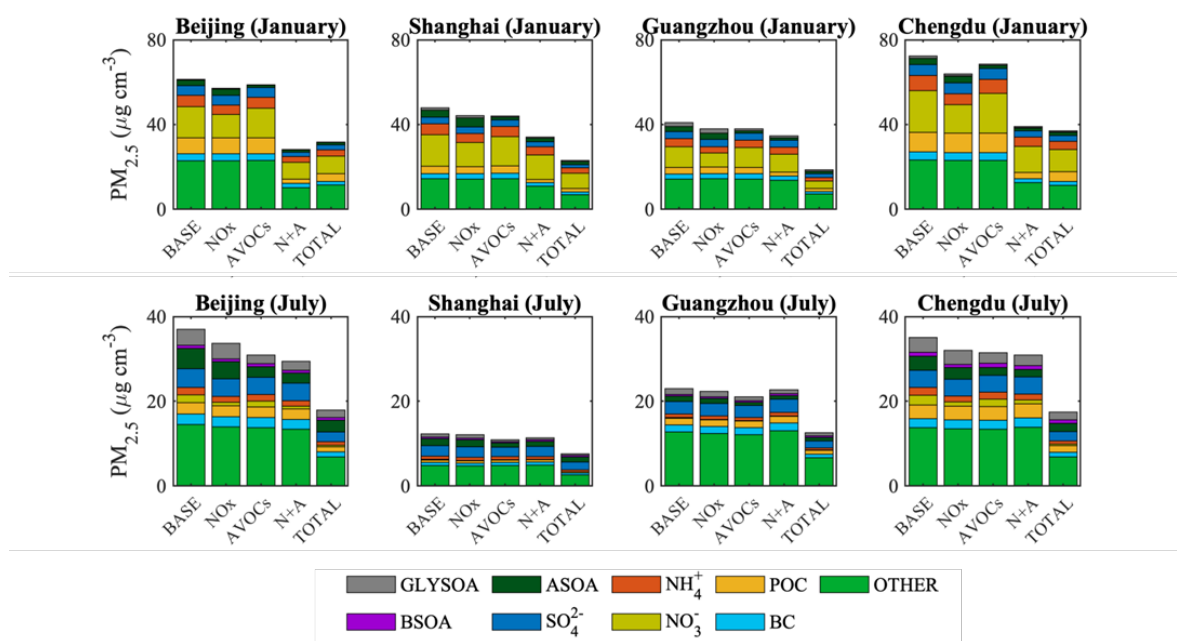

**Figure S17.** Averaged concentration of fine aerosols contributed by different species at four city sites (Beijing, Shanghai, Guangzhou, and Chengdu) in five simulated cases (*BASE*, *NOx*, *AVOCs*, *N+A*, and *TOTAL* cases) in January and July.

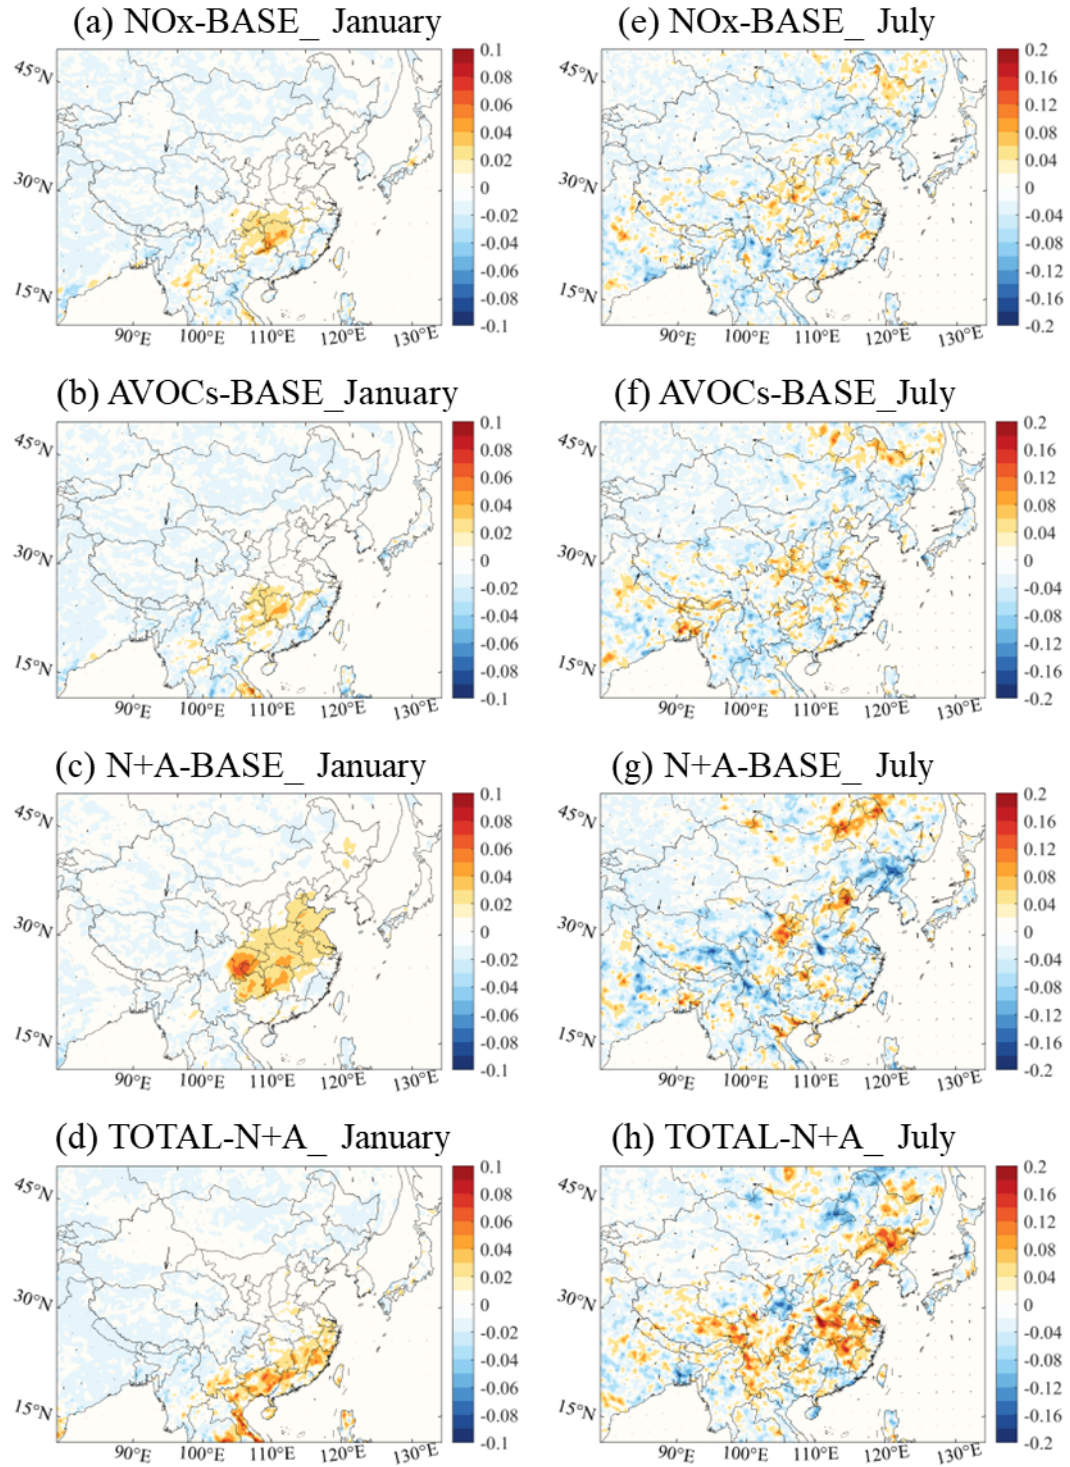

**Figure S18.** Changes in the monthly-averaged value of total photolysis rate (a-d) [Unit: s<sup>-1</sup>] due to the emission reduction in NO<sub>x</sub> (*NO<sub>x</sub>*; a,e), AVOCs (*AVOCs*; b,f), NO<sub>x</sub> and AVOCs (*N+A*; c, g) relative to the *BASE* case and *TOTAL* case relative to *N+A* cases(d, h) in January (a-d) and July (e-h) of 2018.

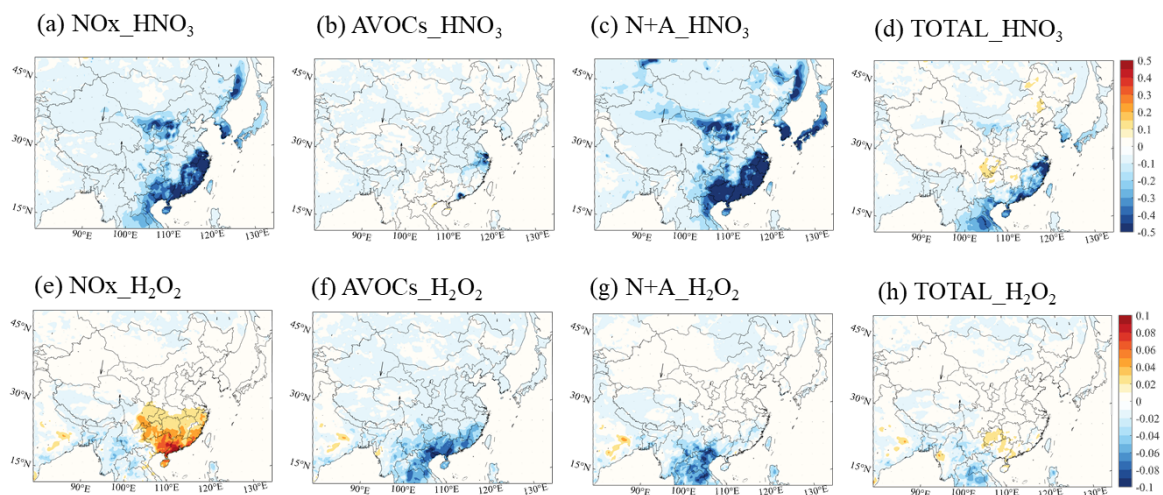

**Figure S19.** Changes in the monthly-averaged concentration of nitric acid ( $\text{HNO}_3$ ) (a-d) and hydrogen peroxide ( $\text{H}_2\text{O}_2$ ) (e-h) response to the  $\text{NO}_x$  (a, e), AVOCs (b, f), N+A (c, g), and TOTAL (d, h) cases relative to *BASE* case in January of 2018.

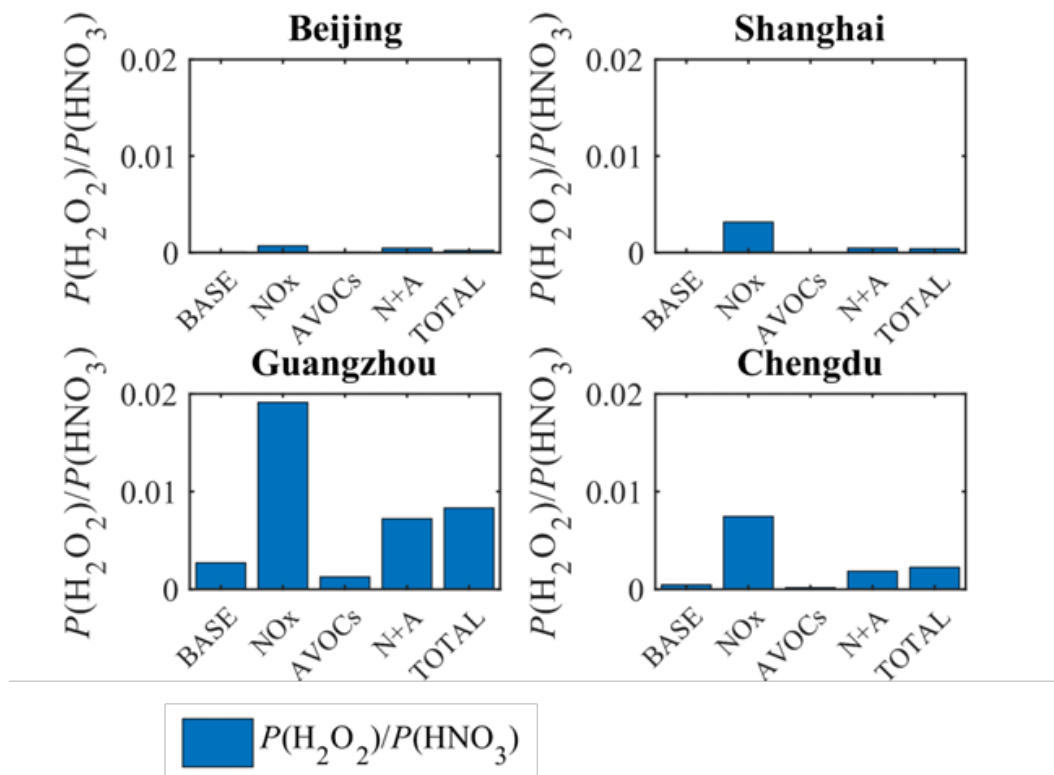

**Figure S20.** The averaged daytime value of ratio between the production rate of hydrogen peroxide ( $\text{H}_2\text{O}_2$ ) and nitric acid ( $\text{HNO}_3$ ) [ $P(\text{H}_2\text{O}_2)/P(\text{HNO}_3)$ ] at four city sites (Beijing, Shanghai, Chengdu, Guangzhou) of China for January 2018 in the five emissions cases. The values of  $P(\text{H}_2\text{O}_2)/P(\text{HNO}_3)$  shown in the figures are lower than 0.06, indicating the ozone sensitivity of VOC-limited at the four sites in five cases.

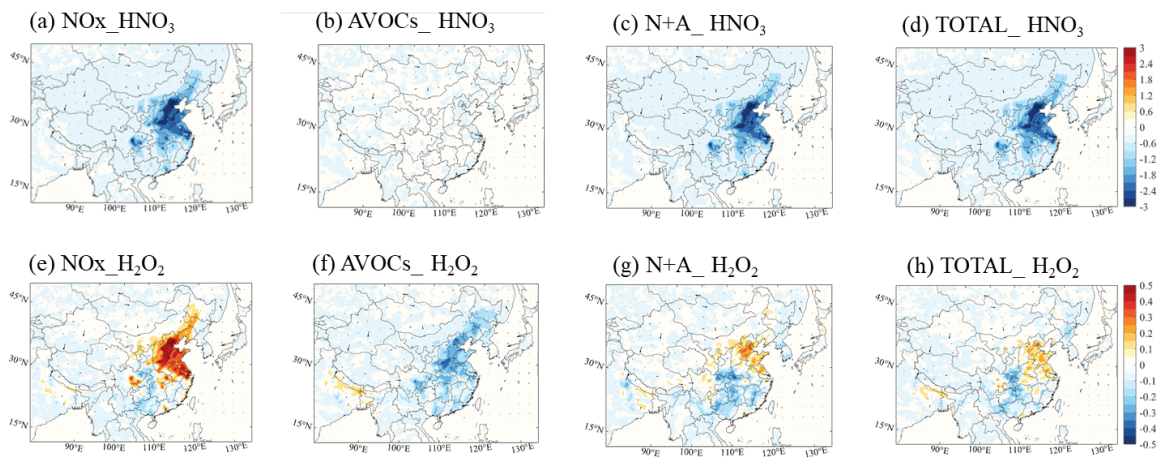

**Figure S21.** Changes in the monthly-averaged daytime concentration of nitric acid ( $\text{HNO}_3$ ) (a-d) and hydrogen peroxide ( $\text{H}_2\text{O}_2$ ) (e-h) response to the  $\text{NO}_x$  (a, e),  $\text{AVOCs}$  (b, f),  $\text{N+A}$  (c, g), and  $\text{TOTAL}$  (d, h) cases relative to BASE case in July of 2018.



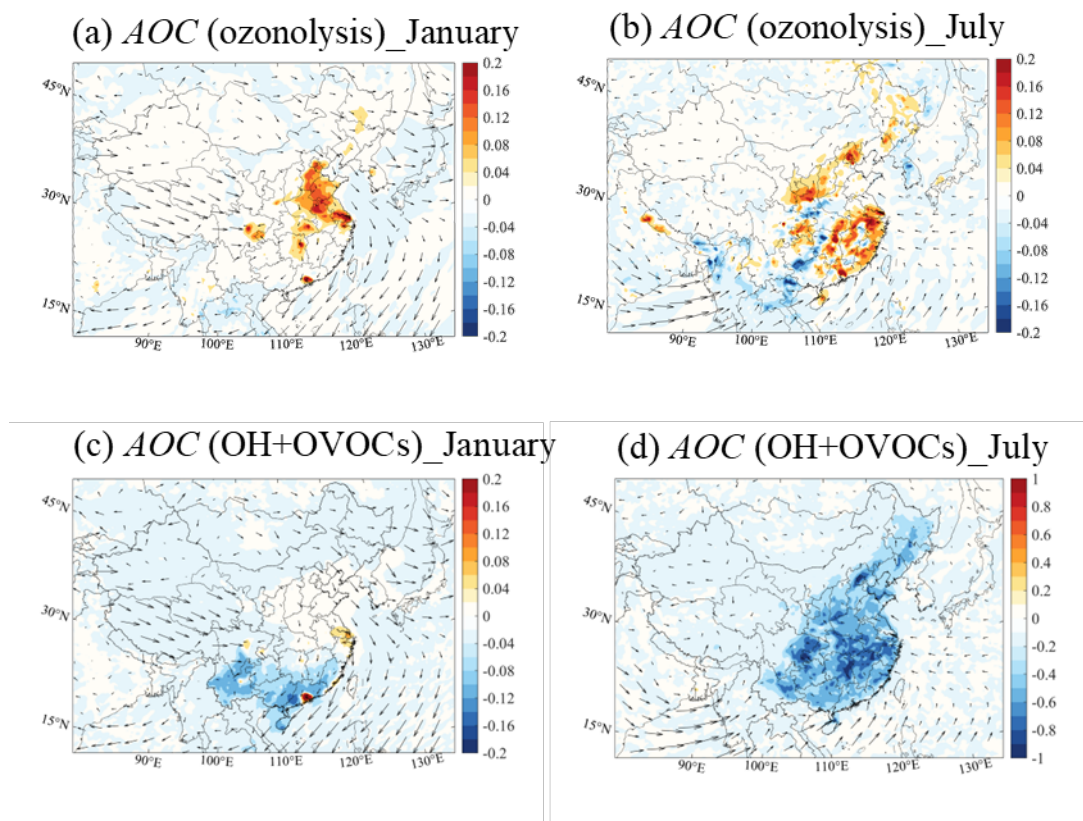

**Figure S22.** Changes in the monthly-averaged value of atmospheric oxidizing capacity (*AOC*) due to the reaction between alkenes and ozone (a, b; Unit:  $10^6$  molec.  $\text{cm}^{-3}$   $\text{s}^{-1}$ ) during nighttime (20:00 to 05:00 LST) and due to the reaction between OVOCs and OH radical in daytime (c, d; Unit:  $10^7$  molec.  $\text{cm}^{-3}$   $\text{s}^{-1}$ ) response to the  $\text{NO}_x$  emissions case relative to *BASE* case in January (a, c) and July (b, d) of 2018.

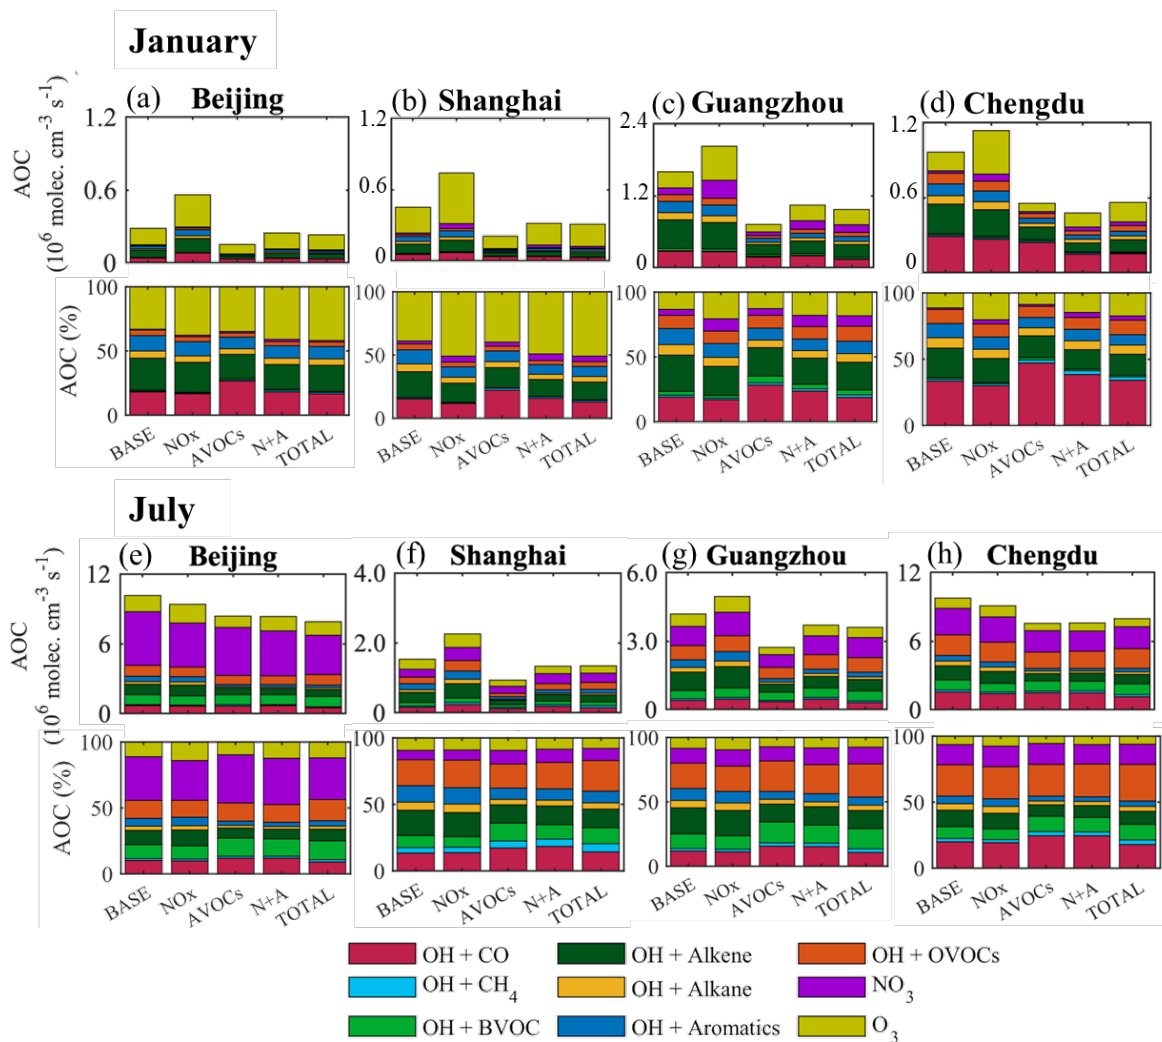

**Figure S23.** Averaged value and relative terms of nighttime *AOC* at the sites of Beijing (a, e), Shanghai (b, f), Guangzhou (c, g), and Chengdu (d, h) in five different simulated cases (*BASE*, *NOx*, *AVOCs*, *N+A*, *TOTAL* cases) in January (a-d) and July (e-h) of 2018. Notice the inconsistency in the scales.

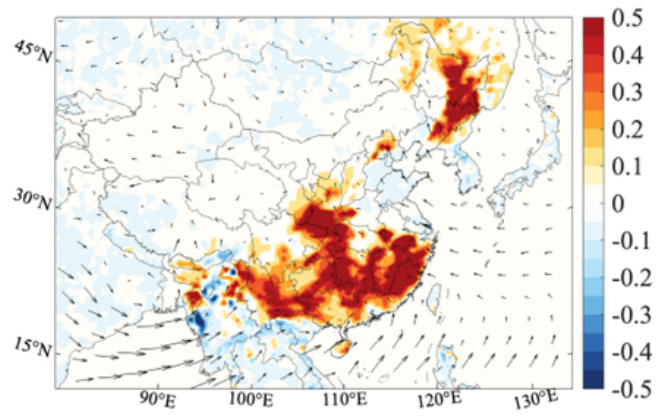

**Figure S24.** Changes in the monthly-averaged concentration of isoprene [Unit: ppbv] response to the reduction in the combined  $\text{NO}_x$  and AVOCs emissions case ( $N+A$  case) relative to the *BASE* case in July of 2018.



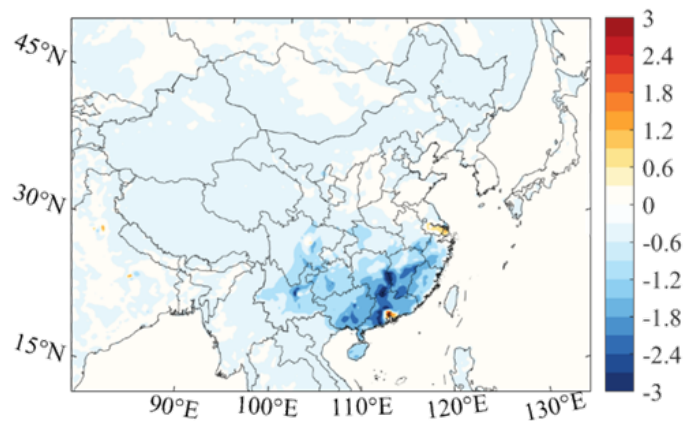

**Figure S25.** Changes in monthly-averaged value of daytime net production rate of odd oxygen [Unit:  $ppbv\ h^{-1}$ ] response to the  $NO_x$  emissions case relative to *BASE* case in January of 2018 (Net  $P(O_x) = P(O_x) - D(O_x)$ ).
